# Supplementary material
Source: PubMed Central journal article supplement (PMC11165669)

---

**Supplementary information to:  
Classify viruses – the gain is worth the pain  
Jens H. Kuhn *et al.***

*Supplementary text to a Comment published in Nature 566, 318–320 (2019)*  
<https://doi.org/10.1038/d41586-019-00599-8>

# Supplementary Figure 1

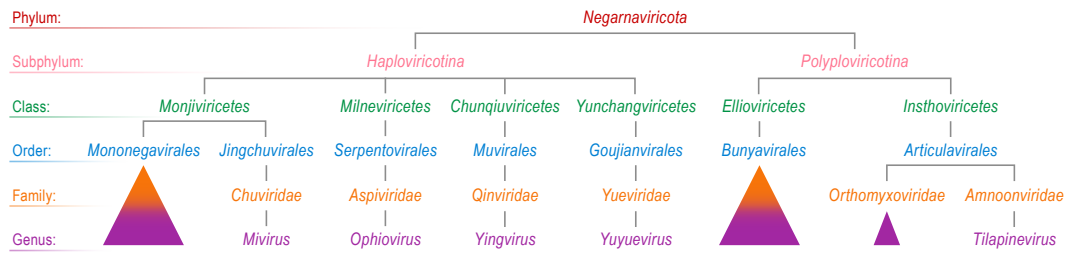

Supplement: NIHMS1986665-supplement-1.pdf [file NIHMS1986665-supplement-1.pdf]
